# Supplementary material for: Large proportion of genes in one cryptic WO prophage genome are actively and sex-specifically transcribed in a fig wasp species
Source: PubMed Central journal article supplement (PMC4201733; doi:10.1186/1471-2164-15-893), 2014-10-13
Supplement: 12864_2014_6559_MOESM2_ESM.pdf [file 12864_2014_6559_MOESM2_ESM.pdf]

1 **Summary statistics for the Quantitative PCR.**

| Strain | Number | Mean Copy Number ( $\times 10^3$ ) $\pm$ SE |                            |                   | Mean Density |
|--------|--------|---------------------------------------------|----------------------------|-------------------|--------------|
|        |        | <i>Wolbachia</i><br><i>groEL</i>            | Phage WOSol<br><i>orf7</i> | <i>orf7:groEL</i> | $\pm$ SE     |
| Female | 31     | 2.20 $\pm$ 0.42                             | 1.69 $\pm$ 0.30            | 0.88 $\pm$ 0.05   |              |
| Male   | 35     | 6.30 $\pm$ 1.09                             | 6.43 $\pm$ 1.03            | 1.15 $\pm$ 0.06   |              |

2

3
