# Supplementary material for: Large proportion of genes in one cryptic WO prophage genome are actively and sex-specifically transcribed in a fig wasp species
Source: PubMed Central journal article supplement (PMC4201733; doi:10.1186/1471-2164-15-893), 2014-10-13
Supplement: 12864_2014_6559_MOESM4_ESM.pdf [file 12864_2014_6559_MOESM4_ESM.pdf]

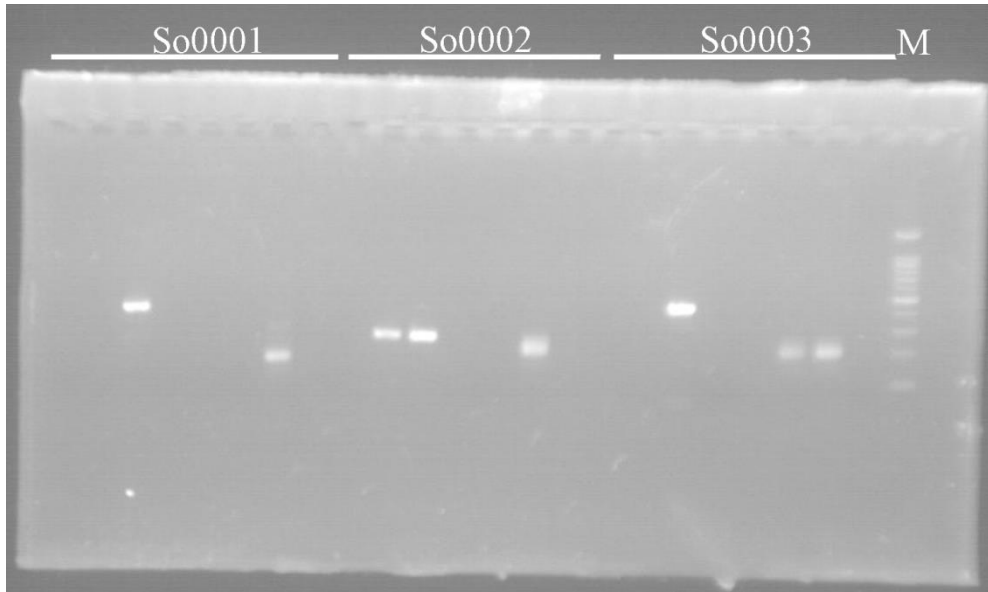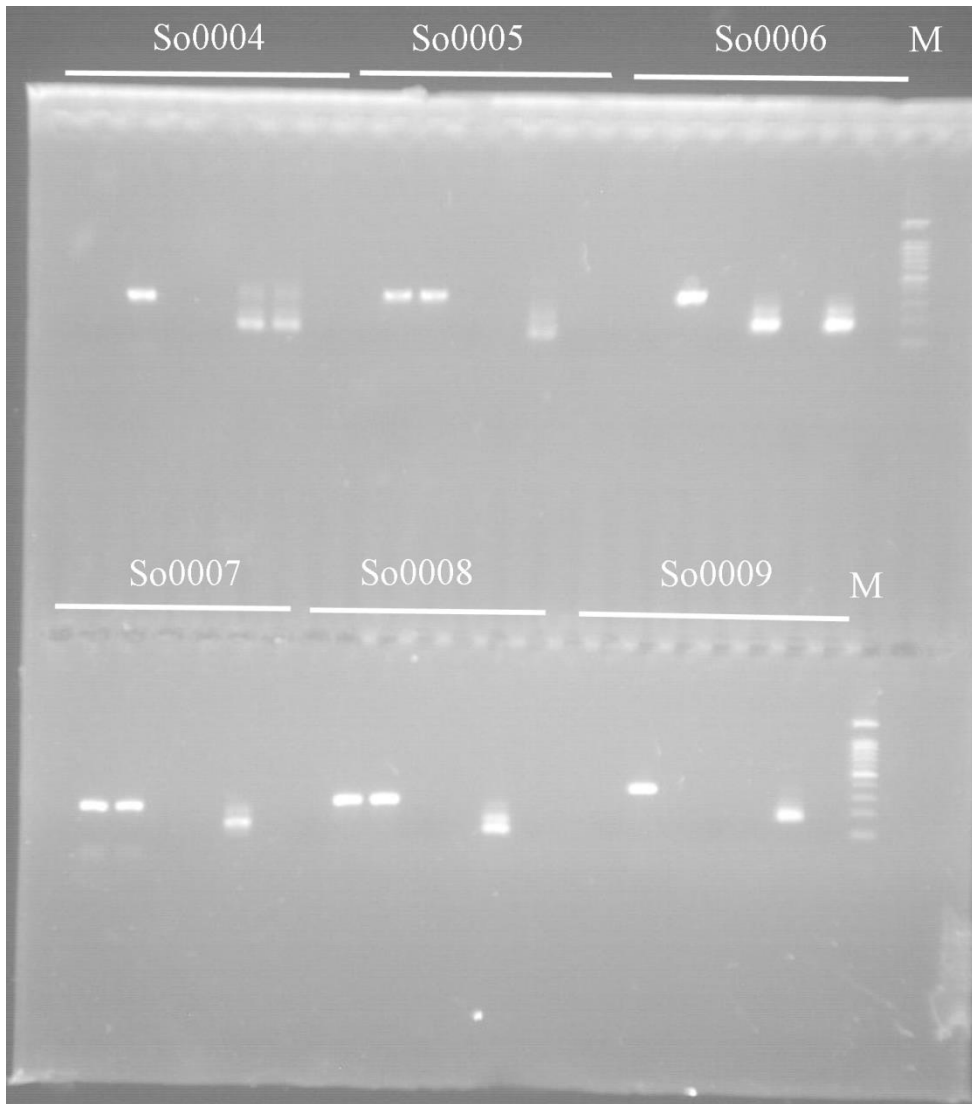

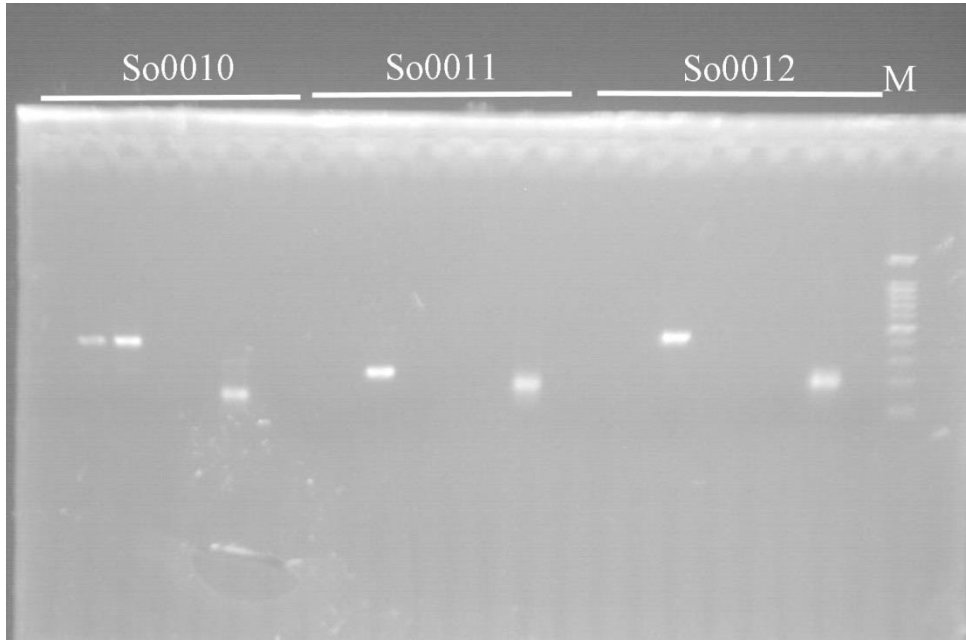

3

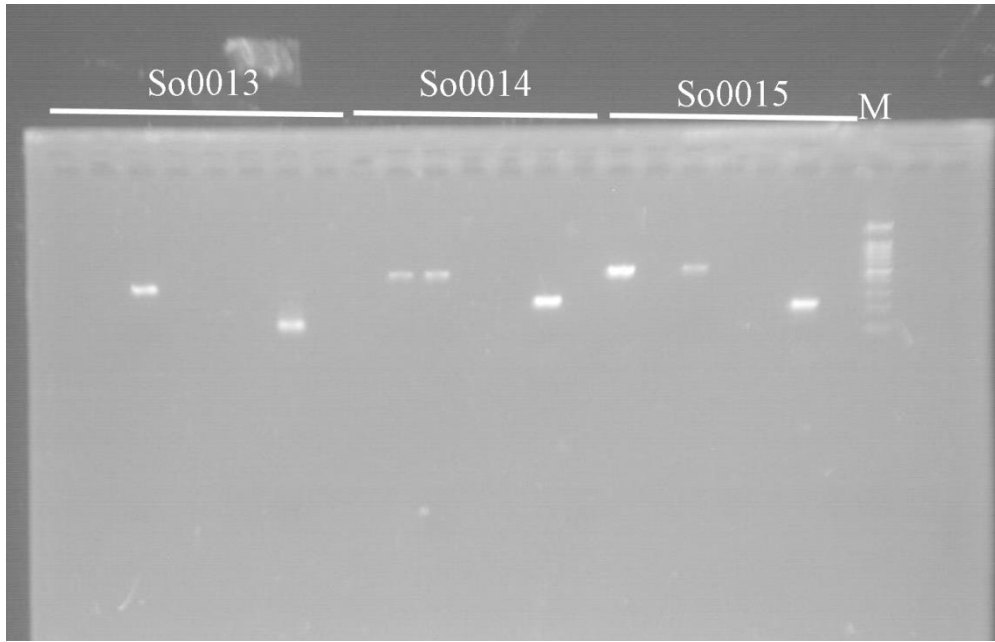

4

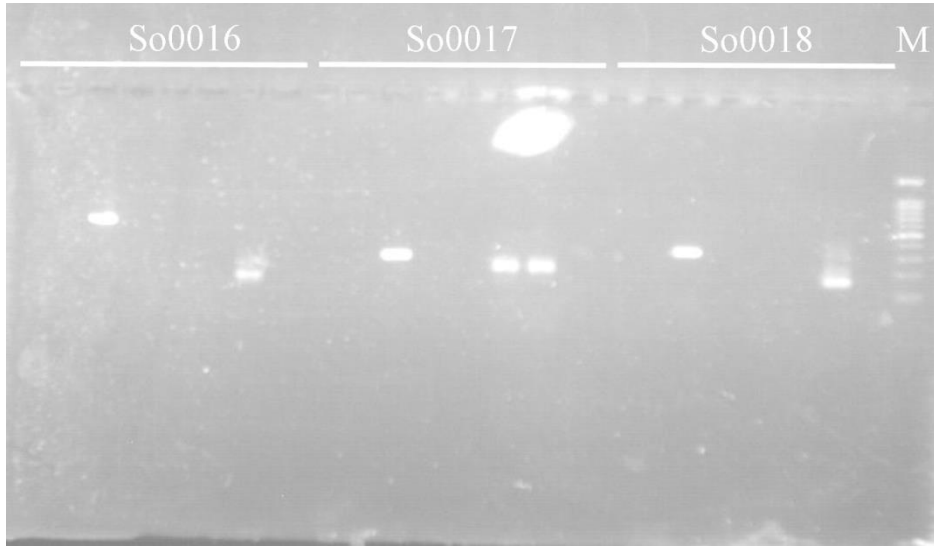

5

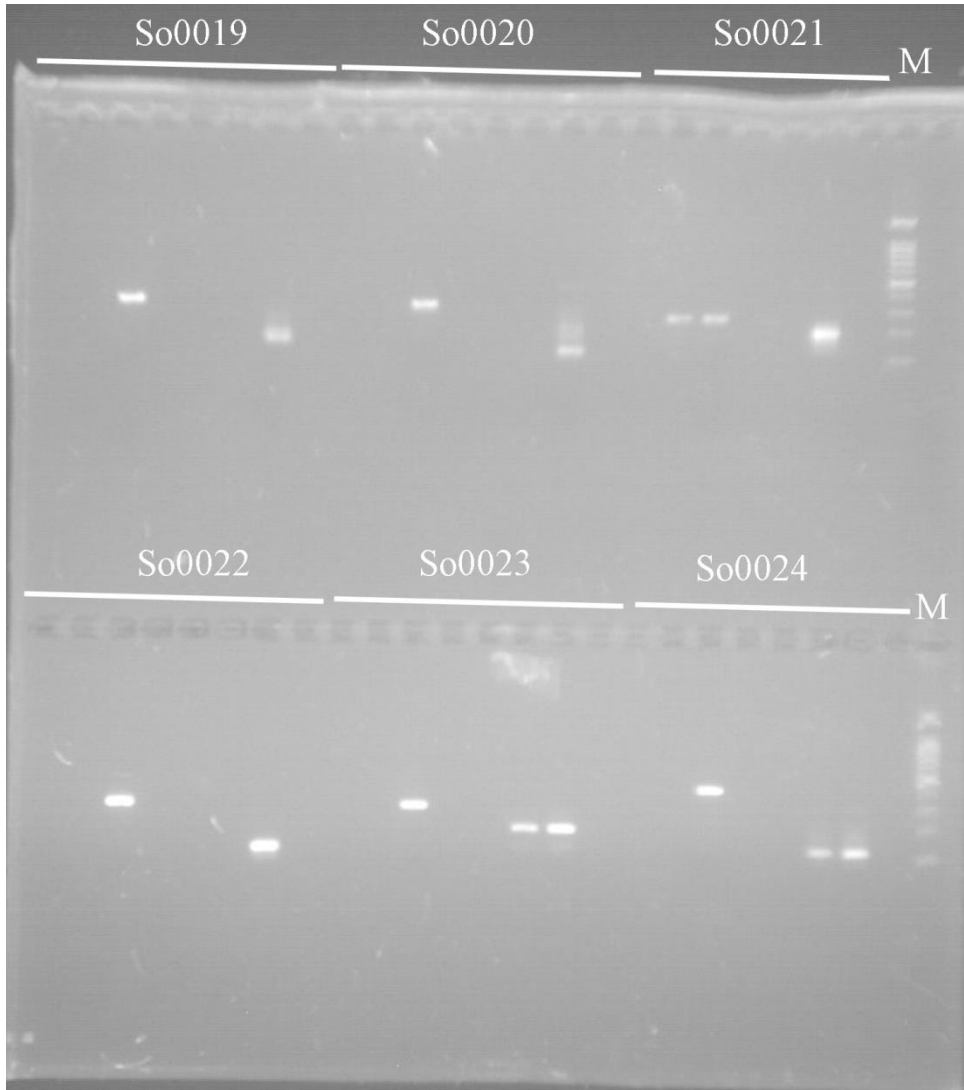

6

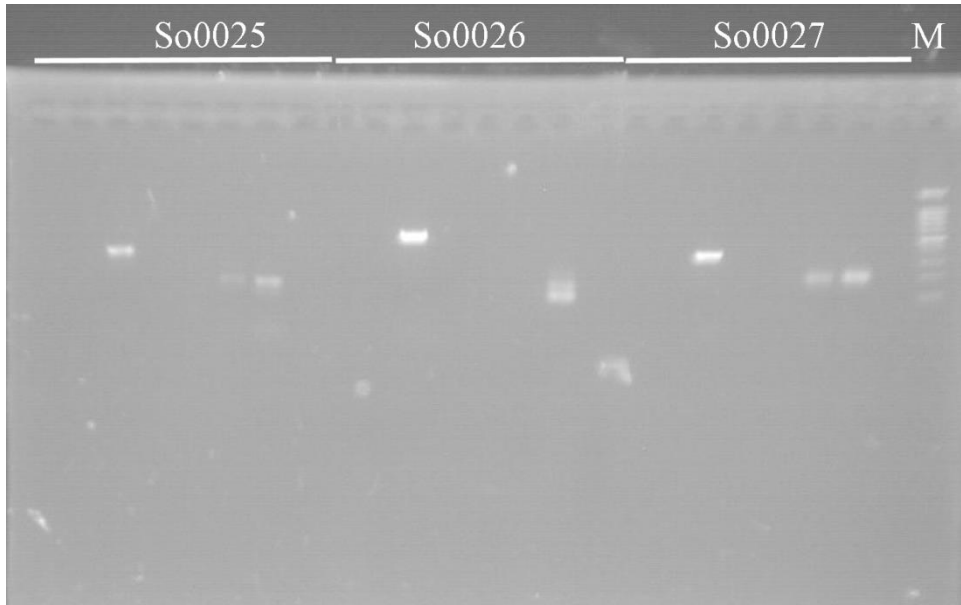

7

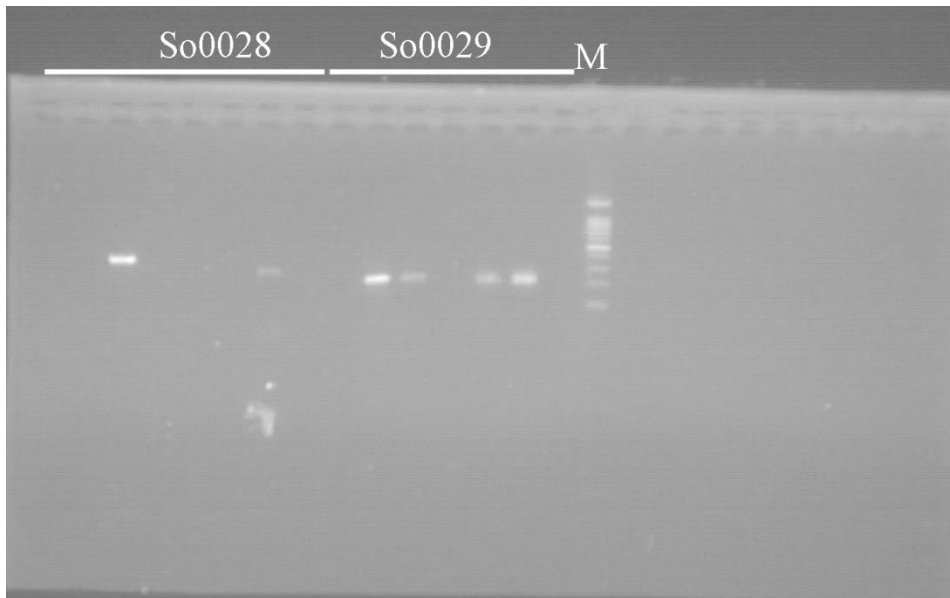

8

9
