# Supplementary material for: Large proportion of genes in one cryptic WO prophage genome are actively and sex-specifically transcribed in a fig wasp species
Source: PubMed Central journal article supplement (PMC4201733; doi:10.1186/1471-2164-15-893), 2014-10-13
Supplement: 12864_2014_6559_MOESM5_ESM.pdf [file 12864_2014_6559_MOESM5_ESM.pdf]

1

2 A

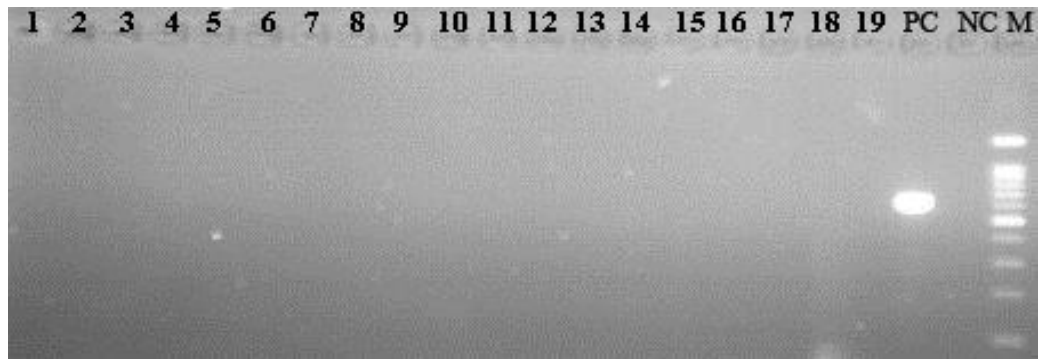

3

4

5 B

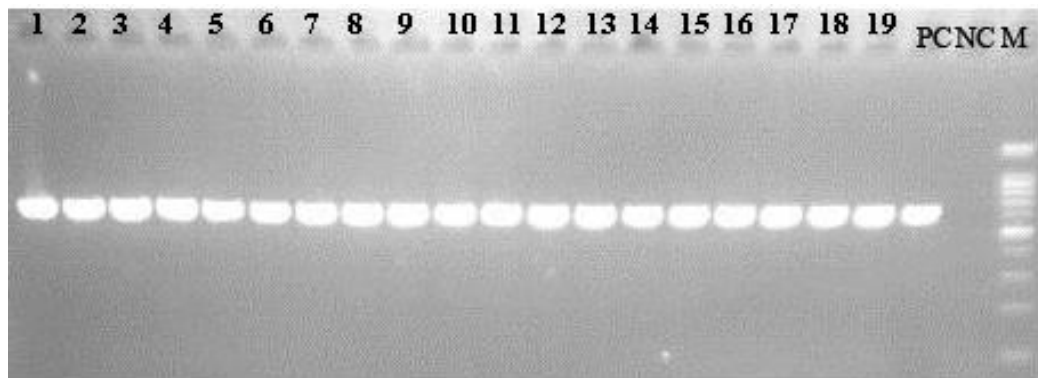

6

7
